# Supplementary material for: Comprehensive assessment of groundwater quality using heavy metal pollution indices and geospatial technique: A case study from Wanaparthy watershed of upper Krishna River basin, Telangana, India.
Source: Research Square preprint supplement (doi:10.21203/rs.3.rs-591235/v1), 2021-06-21
Supplement: Supplementary file 1 [file 6d5a2e29110d922cc3370b8a.docx]

**ELECTRONIC SUPPLEMENTARY MATERIALS**

**Suantak Paolalsiam Vaiphei1 and Rama Mohan Kurakalva1,2***

1Hydrogeochemistry Group, CSIR-National Geophysical Research Institute (CSIR-NGRI)

Hyderabad 500007, Telangana, India.

2Faculty of Physical Sciences, Academy of Scientific & Innovative Research (AcSIR), Ghaziabad 201002, India

***Revised Version***

Submitted to

**Environmental Earth Sciences**

**June 2021**

___________

*Corresponding Author:

E-mail: [krenviron@ngri.res.in](mailto:krenviron@ngri.res.in) ; Tel: 040-27012632; Fax: 040-23434651

[
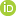
Orcid.org/0000-0001-7199-7475](https://orcid.org/0000-0001-7199-7475)


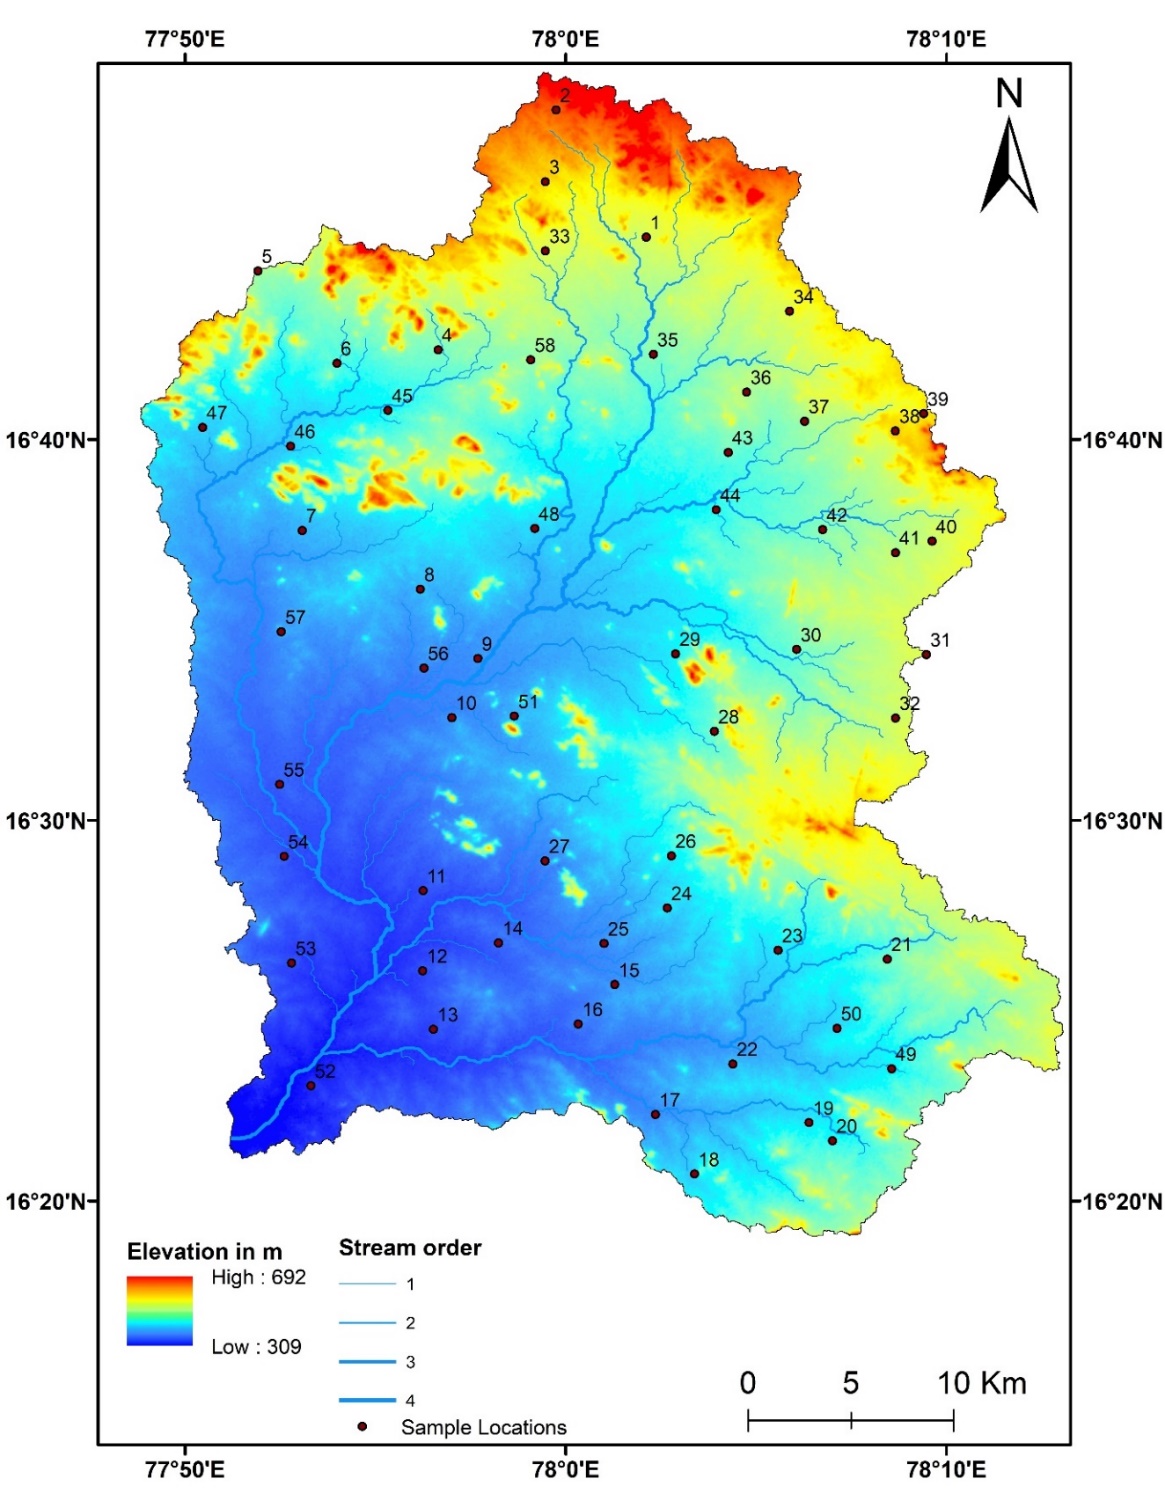


**ESM_Fig.1** Topographical map of the Wanaparthy watershed of upper Krishna River basin, Telangana


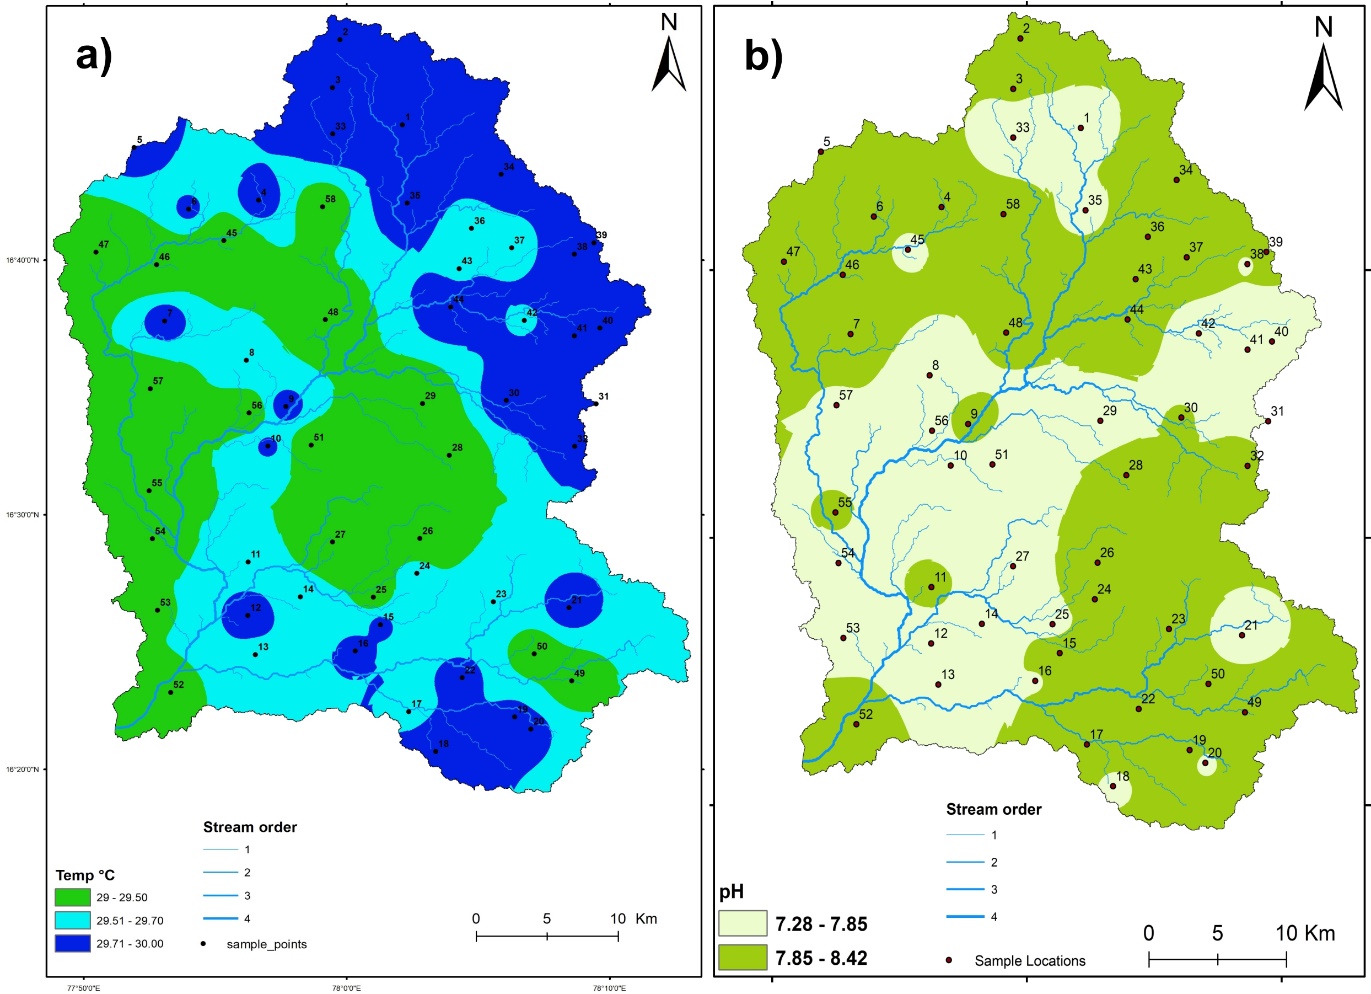

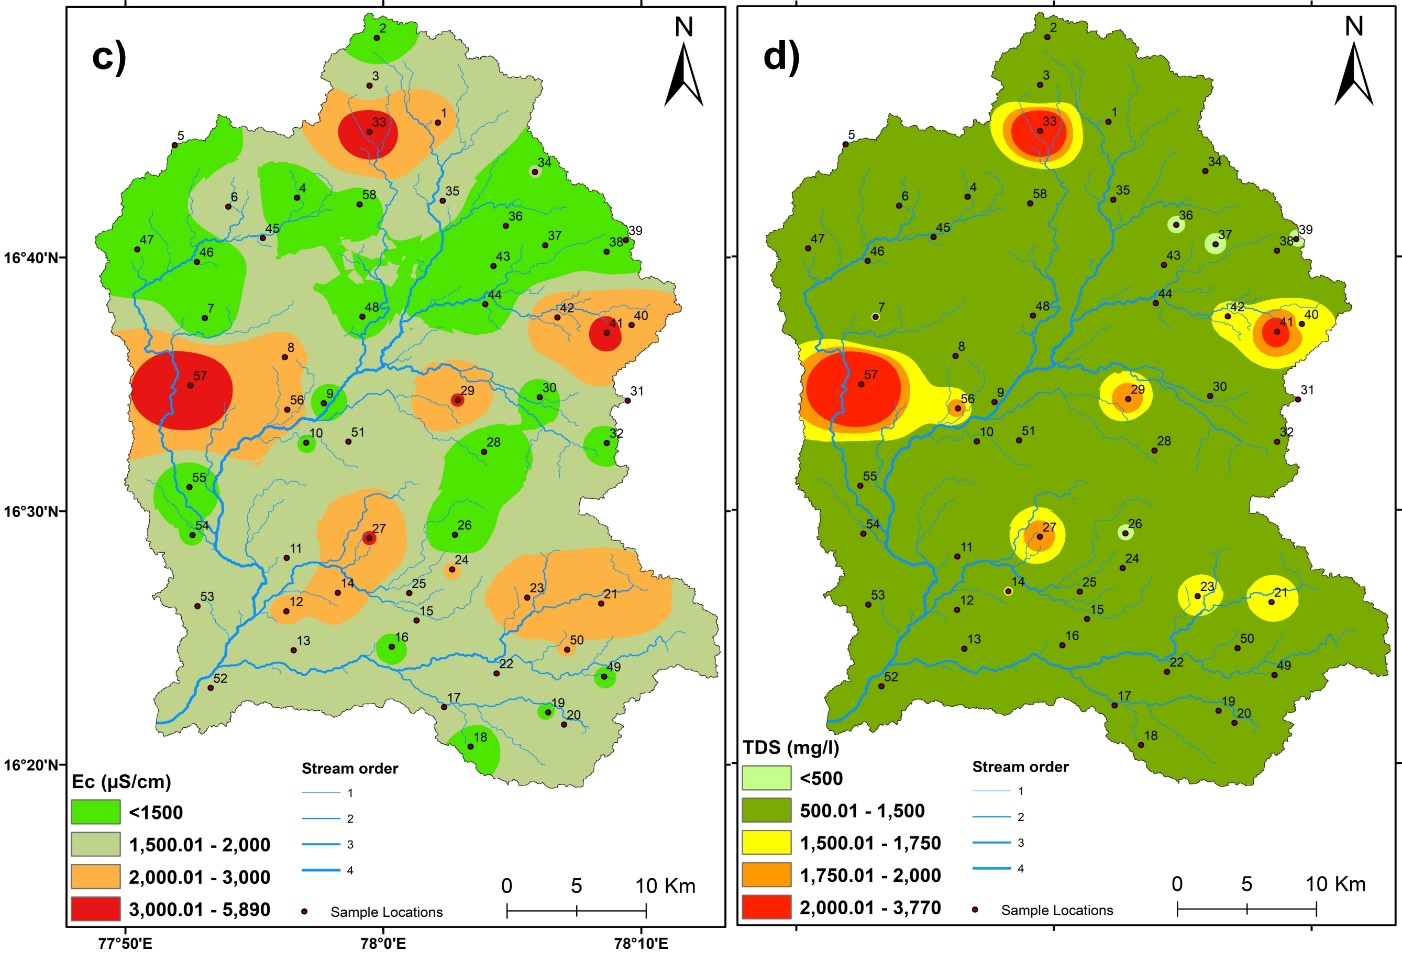


**ESM_Fig.2** Spatial distribution map of a) Temperature b) pH c) EC d) TDS e) TH and f) Alkalinity of groundwater of Wanaparthy watershed


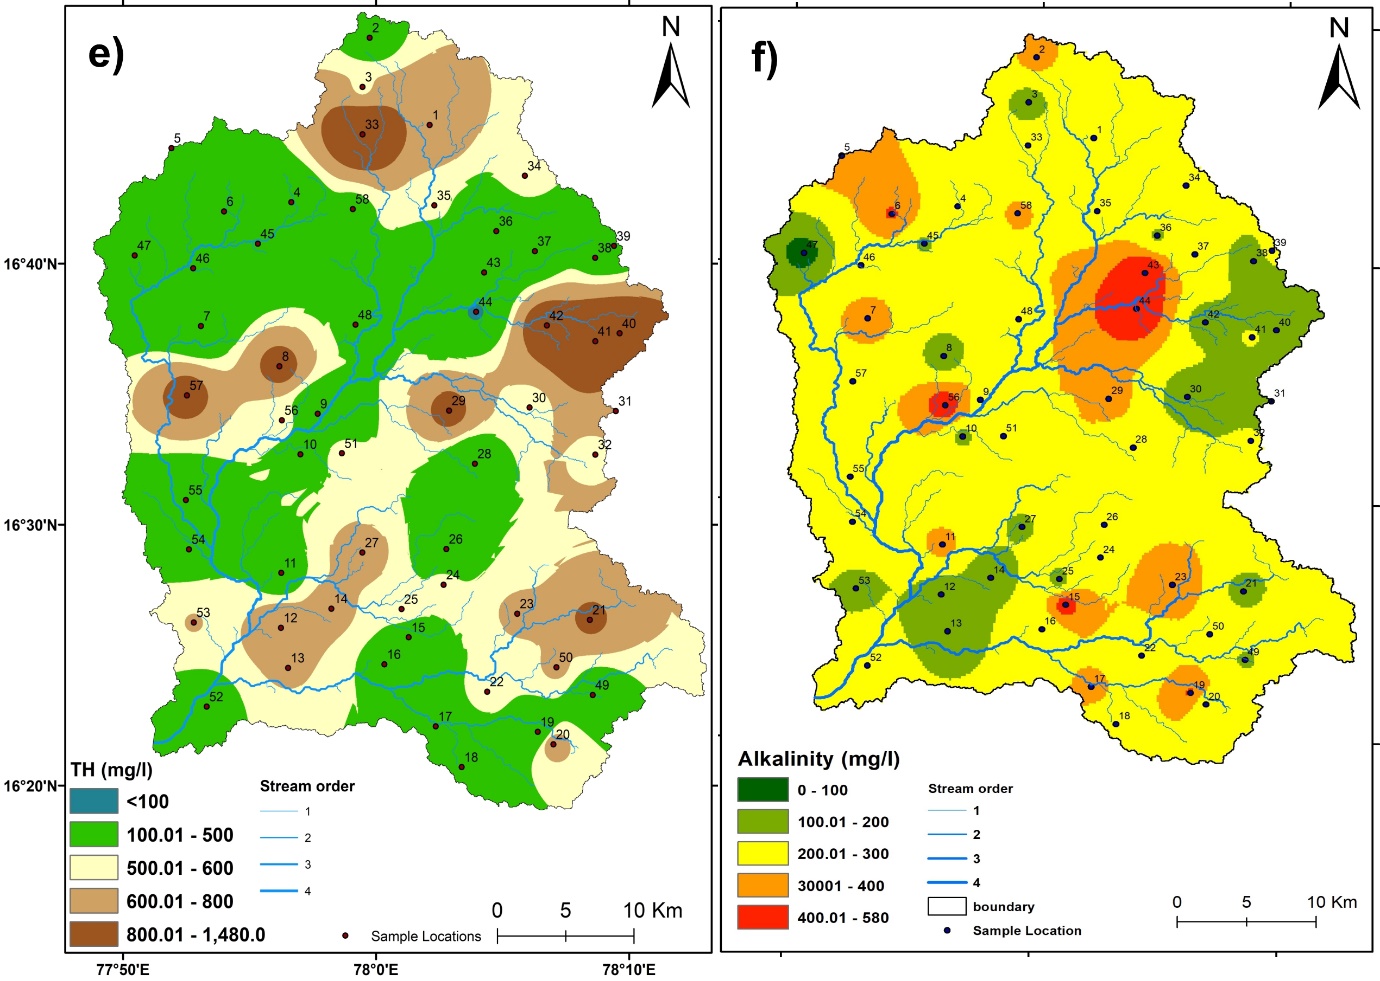


**ESM_Fig.2**. Continue
